# Supplementary material for: Role of Photobiomodulation Therapy in Modulating Oxidative Stress in Temporomandibular Disorders. A Systematic Review and Meta-Analysis of Human Randomised Controlled Trials
Source: MDPI journal article supplement (doi:10.3390/antiox10071028), 2021-06-25
Supplement: s1 [file s1]

**Table S2.** Tabular representation of lasers/LEDs parameters utilised in the chosen eligible *in vivo* RCTs human studies related to temporomandibular dysfunction syndrome (TMD). The abbreviations in this table are listed in Supplementary File S2

| Study, year, origin & citation              | Utilised Laser/ LED wavelength | Emission mode CW/ Gated/ Pulsed | Energy (J) | Power output (W) | Pulse width (PW) & frequency (F) | Use of Power meter | Method of applications (EO or IO) & number of trigger points (TP)                                                                                                                                                                           | Contact /non-contact | Tip-tissue distance | Spot size/spot area/beam & fibre tip diameters | Irradiated/ illuminated area | Energy density [Fluence] (J/cm <sup>2</sup> )                                                        | Power Density (W/cm <sup>2</sup> ) | Exposure time (min/sec) | No.& frequency of sessions              | Treatment duration |
|---------------------------------------------|--------------------------------|---------------------------------|------------|------------------|----------------------------------|--------------------|---------------------------------------------------------------------------------------------------------------------------------------------------------------------------------------------------------------------------------------------|----------------------|---------------------|------------------------------------------------|------------------------------|------------------------------------------------------------------------------------------------------|------------------------------------|-------------------------|-----------------------------------------|--------------------|
| Venancio et al., 2005, Brazil [57]          | 780nm GaALAs diode laser       | NI                              | NI         | 30mW             | NI                               | NI                 | Bilateral EO: 3 TMJ points (a) post. aspect of joint (mouth open) (b) ant. to condyle in sigmoid notch (mouth closed), into condylar neck & disc (insertion of LPM); (c) joint interface with mouth open                                    | NI                   | NI                  | NI                                             | NI                           | 6.3J/cm <sup>2</sup> / point                                                                         | NI                                 | 10sec                   | 6 sessions (Twice a week)               | 3 weeks            |
| Çetiner et al., 2006, Turkey [58]           | 830nm GaAlAs diode laser       | NI                              | NI         | NI               | NI                               | NI                 | EO: 4 TP of the following: joint capsule (lateral, post., sup.), masseter (ant., inf., deep), temporal (ant., deep, middle, origin), MPM; LPM [Bilateral application]                                                                       | Contact              | NA                  | NI                                             | NI                           | 7J/cm <sup>2</sup> / point                                                                           | NI                                 | 162sec                  | 10 sessions daily (excluding weekends)  | 2 weeks            |
| Fikackova et al., 2007, Czech Republic [59] | 830nm GaAlAs diode laser       | NI                              | NI         | 400mW            | NI                               | NI                 | EO: For myofascial pain: painful muscle spots; for TMD arthralgia: front of tragus (mouth open), through external acoustic meatus (mouth closed); 2cm in front of tragus, under zygoma (mouth closed) (No. of TP or allocation unspecified) | Contact              | NA                  | Probe aperture size: 0.2cm <sup>2</sup>        | NI                           | GA: 10J/cm <sup>2</sup> / point<br>GB: 15J/cm <sup>2</sup> /point<br>GC: 0.1J/cm <sup>2</sup> /point | NI                                 | NI                      | 10 sessions (Interval time unspecified) | 4 weeks            |
| Mazzetto et al., 2007, Brazil [60]          | 780nm GaALAs diode laser       | CW                              | NI         | 70mW             | NA                               | NI                 | EO: TMJ region, at 1 point: inside the external auditive duct towards retrodiscal region [Bilateral application]                                                                                                                            | Contact              | NA                  | NI                                             | NI                           | 89.7J/cm <sup>2</sup> / point                                                                        | NI                                 | 10sec                   | 8 sessions (Twice a week)               | 4 weeks            |
| Frare et al., 2008, Brazil [61]             | 904nm GaAs diode laser         | CW                              | NI         | 15mW             | NA                               | Yes                | EO: 5 TP: 4 in a shape of a cross in the pre-auricular region; & 1 in external auditory meatus [Bilateral application].                                                                                                                     | Contact              | NA                  | Beam area: 0.039cm <sup>2</sup>                | NI                           | 7J/cm <sup>2</sup> / point                                                                           | 0.38mW/cm <sup>2</sup> / point     | 16 sec/point            | 8 sessions (Twice a week)               | 4 weeks            |
| Da Cunha et al., 2008, Brazil [62]          | 830nm GaAlAs diode laser       | NI                              | 4J/point   | 500mW            | NI                               | NI                 | EO: painful areas (No. of TP or allocation unspecified)                                                                                                                                                                                     | Contact              | NA                  | NI                                             | NI                           | 100J/cm <sup>2</sup> / point                                                                         | NI                                 | 20sec/site              | 4 sessions (Once a week)                | 4 weeks            |

|                                    |                                        |                              |                                                             |                                                                                                            |                             |     |                                                                                                                                                                                                                                                                                                                                        |         |    |                                                                     |    |                                                                                                                                                                                                                                                                                       |    |                                            |                                               |         |
|------------------------------------|----------------------------------------|------------------------------|-------------------------------------------------------------|------------------------------------------------------------------------------------------------------------|-----------------------------|-----|----------------------------------------------------------------------------------------------------------------------------------------------------------------------------------------------------------------------------------------------------------------------------------------------------------------------------------------|---------|----|---------------------------------------------------------------------|----|---------------------------------------------------------------------------------------------------------------------------------------------------------------------------------------------------------------------------------------------------------------------------------------|----|--------------------------------------------|-----------------------------------------------|---------|
| Lassemi et al., 2008, Iran [63]    | 980nm diode laser                      | Puled                        | 2J/point (Total: 6J) 1.5J at the other sites of muscle pain | NI                                                                                                         | F: 80 Hz<br>PW: NI          | NI  | EO: (a) post. part of joint-mouth open ( post. articular branches of auriculotemporal nerve) (2 J for 1 min), (b) an area ant. to condyle in sigmoid notch-mouth closed for LPM insertion in condylar neck & meniscus (2 J for 1 min); (c) joint interface-mouth open (2 J for 1 min); TP in adjacent muscles (No. of TP unspecified). | Contact | NA | NI                                                                  | NI | NI                                                                                                                                                                                                                                                                                    | NI | 1min                                       | 2 sessions (48-h interval)                    | 4 days  |
| Carrasco et al., 2008, Brazil [64] | 780nm GaAlAs diode laser               | CW                           | NI                                                          | 70mW                                                                                                       | NA                          | NI  | EO: 5 points of the TMJ area: lateral, sup., ant., post. & posterior-inferior of condylar [Bilateral application].                                                                                                                                                                                                                     | Contact | NA | NI                                                                  | NI | 105J/cm <sup>2</sup> / point                                                                                                                                                                                                                                                          | NI | 60sec                                      | 8 sessions (Twice a week)                     | 4 weeks |
| Emshoff et al., 2008, Austria [65] | HeNe 632.8nm diode laser               | CW                           | NI                                                          | 30mW                                                                                                       | NA                          | Yes | EO: centre of the upper joint space, 1 cm in front of the tragus (No. of TP or allocation unspecified)                                                                                                                                                                                                                                 | Contact | NA | NI                                                                  | NI | 1.5J/cm <sup>2</sup> / point                                                                                                                                                                                                                                                          | NI | 2 mins at both closed mouth & MMO position | 1 series of 20 sessions (2 to 3 times a week) | 8 weeks |
| Carrasco et al., 2009, Brazil [66] | 780nm GaAlAs diode laser               | CW                           | NI                                                          | GI: 50mW<br>GII: 60mW<br>GIII: 70mW<br>GIV: 50mW<br>Placebo<br>GV: 60mW<br>Placebo<br>GVI: 70mW<br>Placebo | NA                          | NI  | EO: (No. of TP or allocation unspecified)                                                                                                                                                                                                                                                                                              | Contact | NA | NI                                                                  | NI | GI-LLLT: 25J/cm <sup>2</sup> / point<br>GII- LLLT: 60J/cm <sup>2</sup> / point<br>GIII- LLLT: 100J /cm <sup>2</sup> / point.<br>GIV- LLLT Placebo: 25J/ cm <sup>2</sup> / point<br>GV-LLLT Placebo: 60J /cm <sup>2</sup> / point<br>GVI- LLLT, Placebo: 100J /cm <sup>2</sup> / point | NI | NI                                         | 8 sessions (Twice a week)                     | 4 weeks |
| Shirani et al., 2009, Iran [67]    | Two diode laser probes (660nm & 890nm) | 660 nm: CW<br>890 nm: Pulsed | 6-10 J/ point                                               | 660nm: 17.3mW<br>890nm: 9.8W                                                                               | F:1500 Hz<br>PW: NI (890nm) | Yes | EO: tender TP of masseter. IO: MPT, LPM (No. of TP or allocation unspecified)                                                                                                                                                                                                                                                          | Contact | NA | Spot size: 0.6cm <sup>2</sup><br>Irradiated area: 1 cm <sup>2</sup> | NI | 660nm: 6.2J /cm <sup>2</sup> / point<br>890nm: 1J/cm <sup>2</sup> / point                                                                                                                                                                                                             | NI | 660 nm: 6 min<br>890 nm:10 min             | 6 sessions (Twice a week)                     | 3 weeks |
| Venezian et al., 2010, Brazil [68] | GaAlAs diode laser (780nm)             | CW                           | NI                                                          | GI- 50mW                                                                                                   | NA                          | NI  | EO: 4 points (upper, middle & lower thirds of masseter (3 points) & ant.                                                                                                                                                                                                                                                               | Contact | NA | NI                                                                  | NI | GI:25J/cm <sup>2</sup> /point                                                                                                                                                                                                                                                         | NI | GI: 20 secs                                | 8 sessions (Twice a week)                     | 4 weeks |

|                                                        |                                                                |                  |                                       |                                                                     |                           |     |                                                                                                                                                                                       |                 |     |                          |    |                                                                                              |    |                                                                                                             |                                                             |         |
|--------------------------------------------------------|----------------------------------------------------------------|------------------|---------------------------------------|---------------------------------------------------------------------|---------------------------|-----|---------------------------------------------------------------------------------------------------------------------------------------------------------------------------------------|-----------------|-----|--------------------------|----|----------------------------------------------------------------------------------------------|----|-------------------------------------------------------------------------------------------------------------|-------------------------------------------------------------|---------|
|                                                        |                                                                |                  |                                       | GII-<br>50mW<br>Placebo<br>GIII-<br>60mW<br>GIV-<br>60mW<br>Placebo |                           |     | region of temporalis (1<br>point)                                                                                                                                                     |                 |     |                          |    | GII: 25J/cm²/<br>point, Placebo<br>GIII: 60J/<br>cm²/point<br>GIV:60J/cm²/<br>point, Placebo |    | GII: 20<br>secs<br>GIII: 40<br>secs<br>GIV: 40<br>secs                                                      |                                                             |         |
| Oz et al.,<br>2010,<br>Turkey [69]                     | Low-<br>intensity<br>semiconduc-<br>tor diode<br>laser:820nm   | CW               | NI                                    | 300mW/<br>point                                                     | NA                        | NI  | EO: 3 points of masseter<br>(sup., middle, inf.), 1point<br>of temporalis (ant.) on<br>both sides                                                                                     | Non-<br>contact | 2mm | Beam<br>diameter:<br>6mm | NI | 3 J/cm²/ point                                                                               | NI | 10 secs/<br>point                                                                                           | 10 sessions<br>(Twice a<br>week)                            | 5 weeks |
| Marini et<br>al., 2010,<br>Italy [70]                  | 910nm<br>GaAs diode                                            | Super-<br>pulsed | NI                                    | Average<br>power:<br>400mW<br>Peak<br>power:<br>45W                 | F:1-50 kHz<br>PW: <200 ns | Yes | EO: in right and left TMJ<br>(No. of trigger points or<br>allocation not mentioned)<br>[Bilateral application].                                                                       | Contact         | NA  | NI                       | NI | NI                                                                                           | NI | 3 steps<br>therapy/<br>TMJ<br>120 kHz<br>for 10<br>mins<br>2.18k Hz<br>for 5 mins<br>3.16 kHz<br>for 5 mins | 10 sessions<br>(10<br>consecutive<br>days ; 5<br>days/week) | 2 weeks |
| Rohlig et al.,<br>2011,<br>Turkey [71]                 | Low-<br>intensity<br>semiconduc-<br>tor (820nm)<br>diode laser | CW               | NI                                    | 300mW/<br>point                                                     | NA                        | NI  | EO: 5 points<br>3 on masseter (sup.,<br>middle, inf.), 1 on<br>temporalis (ant.) & 1 on<br>sup. SCM.                                                                                  | Contact         | NA  | Beam<br>diameter:<br>6mm | NI | 8J/cm²/point                                                                                 | NI | 10<br>sec/point                                                                                             | 10 sessions<br>(Every<br>alternate<br>day)                  | 3 weeks |
| Sattayut et<br>al., 2012,<br>United<br>Kingdom<br>[72] | 820nm<br>GaAlAs<br>diode laser                                 | NI               | G1: 4J/<br>point<br>G2: 20J/<br>point | G1:<br>60mW<br>G2:<br>300mW                                         | NI                        | NI  | EO: 6 points<br>Post. TMJ, sigmoid notch,<br>joint interface, 3 tender<br>TP in masticatory muscles<br>elicited by palpation<br>[Unilateral application]                              | Contact         | NA  | NI                       | NI | G1: LLLT-<br>21.4J/cm²/<br>point<br>G2: LLLT-<br>107J/cm²/<br>point                          | NI | NI                                                                                                          | 3 sessions<br>(Every<br>alternate<br>day)                   | 1 week  |
| De Carli et<br>al., 2012,<br>Brazil [73]               | 808nm<br>GaAlAs<br>diode laser                                 | NI               | 2.8 J/point<br>Total: 56 J            | 100mW/<br>point                                                     | NI                        | Yes | EO: 10 TP of TMJ &<br>muscle: joint capsule<br>(lateral, post., sup., ant.,<br>inf.), masseter (origin,<br>insertion) & temporal<br>(ant., middle, post.).<br>[Bilateral application] | NI              | NI  | Spot size:<br>0.028cm²   | NI | 100J/cm²/<br>point                                                                           | NI | 28 secs                                                                                                     | 4 sessions<br>(Twice a<br>week)                             | 10 days |
| da Silva et<br>al., 2012,<br>Brazil [74]               | 780nm<br>GaAlAs<br>diode laser                                 | CW               | NI                                    | 70mW                                                                | F: NA<br>PW: NA           | NI  | EO: 5 TP Condylar points<br>(ant., sup., post., post-<br>inf.) & external auditory<br>meatus), 3-masseter & 1-<br>ant. temporalis [Bilateral<br>application]                          | Contact         | NA  | Beam<br>diameter:<br>5mm | NI | GI: 52.5J/<br>cm²/point<br>GII: 105J/cm²/<br>point<br>GIII: Placebo                          | NI | GI:30 sec<br>GII:60 sec<br>GIII:30<br>sec                                                                   | 10 sessions<br>(Twice a<br>week)                            | 5 weeks |

|                                    |                                                                                                |             |                                         |                                 |                       |     |                                                                                                                                                                                                                               |             |      |                          |                                     |                                                            |                                                     |                |                                                                                                                                  |         |
|------------------------------------|------------------------------------------------------------------------------------------------|-------------|-----------------------------------------|---------------------------------|-----------------------|-----|-------------------------------------------------------------------------------------------------------------------------------------------------------------------------------------------------------------------------------|-------------|------|--------------------------|-------------------------------------|------------------------------------------------------------|-----------------------------------------------------|----------------|----------------------------------------------------------------------------------------------------------------------------------|---------|
| Panhoca et al., 2013, Brazil [75]  | GI: red-LED (630±10nm),<br>GII: IR-LED (850± 10nm)<br>GIII: Control positive, IR-laser (780nm) | NI          | GI & GII: 9J/ point<br>GIII:4.2J /point | GI and GII: 150mW<br>GIII: 70mW | NI                    | Yes | EO: 5 TP: 3 points around TMJ, 1 point for temporalis & 1 point near the masseter [Bilateral application].                                                                                                                    | Contact     | NA   | GIII: Spot size: 0.04cm² | GI &GII: Illuminati-on area: 0.5cm² | GI and GII: 18J/cm²/ point<br>GIII: 105J/cm²/ point        | GI & GII: 300mW/cm²/ point<br>GIII: 1.7W/cm²/ point | 60 sec/ point  | 8 sessions (Twice a week)                                                                                                        | 4 weeks |
| Uemoto et al., 2013, Brazil [76]   | 795nm IR-diode laser                                                                           | NI          | NI                                      | 80mW                            | NI                    | NI  | EO: MTPs in masseter (No. of TP or allocation unspecified) [Bilateral application].                                                                                                                                           | Contact     | NA   | NI                       | NI                                  | Right masseter: 4J/cm²/point<br>Left masseter 8J/cm²/point | NI                                                  | NI             | 4 sessions<br>72 hr interval between 1&2 sessions;<br>48 hr interval between 2&3 session;<br>72 hr interval between 3&4 sessions | 8 days  |
| Ahrari et al., 2014, Iran [77]     | 810nm diode laser                                                                              | Pulsed mode | 6J/ point                               | 50mW/ point                     | F: 1500 Hz<br>PW: 1µs | Yes | EO: masseter (origin, body, insertion); temporalis (ant., middle, post.) & MPM insertion (No. of TP unspecified) [Bilateral application].                                                                                     | Contact     | NA   | Spot size: 1.76cm²       | NI                                  | 3.4J/cm²/ point                                            | NI                                                  | 120 sec/ point | 12 sessions (3 times a week)                                                                                                     | 4 weeks |
| Demirkol et al., 2014, Turkey [78] | Nd:YAG, 1064nm                                                                                 | Pulsed      | NI                                      | 250mW/p oint                    | F: NA<br>PW: NA       | NI  | EO: TP of masticatory muscles (No. TP or allocation unspecified)                                                                                                                                                              | Non-contact | 1cm² | NI                       | NI                                  | 8J/cm²/point                                               | NI                                                  | 20 sec/ point  | 10 sessions (Once a day)                                                                                                         | 10 days |
| Pereira et al., 2014, Brazil [79]  | 660nm (red laser) & 795nm (IR- laser).                                                         | NI          | NI                                      | NI                              | NI                    | NI  | EO: TMJ (post. ligament & lateral pole); EO muscles (temporalis, masseter, post. mandibular & submand. regions; IO muscles (LPM & temporal tendon). Cervical muscles (suboccipital, SCM & trapezius). (No. of TP unspecified) | NI          | NI   | NI                       | NI                                  | Muscle: 8J/cm²/point<br>TMJ: 4J/cm²/point                  | NI                                                  | NI             | 3 sessions (48 hr interval time)                                                                                                 | 1 week  |

|                                       |                                                           |    |                           |                                                         |                 |     |                                                                                                                                                                                                                  |             |               |                                 |    |                                                                                                |    |                                                               |                                              |                 |
|---------------------------------------|-----------------------------------------------------------|----|---------------------------|---------------------------------------------------------|-----------------|-----|------------------------------------------------------------------------------------------------------------------------------------------------------------------------------------------------------------------|-------------|---------------|---------------------------------|----|------------------------------------------------------------------------------------------------|----|---------------------------------------------------------------|----------------------------------------------|-----------------|
| Maia et al., 2014, Brazil [80]        | 808nm GaAlAs diode laser                                  | CW | Total: 1.9J               | 100mW                                                   | NA              | NI  | EO: 5 TP: ant. temporalis & masseter, 4 forming a cross & 1 central point; distance between each point: 1cm [Bilateral application]                                                                              | NI          | NI            | Spot area: 0.028cm <sup>2</sup> | NI | 70J/cm <sup>2</sup> /point                                                                     | NI | 19 sec/point                                                  | 8 sessions (Twice a week)                    | 4 weeks         |
| Sancakli et al., 2015, Turkey [81]    | 820nm diode laser                                         | CW | NI                        | 300mW/point                                             | NA              | NI  | EO (Bilateral) LGI: LLLT Greatest painful points on masseter and/or temporalis (No. of TP or allocation unspecified). LGII: 6 TP: 3 on masseter (sup., middle, and inf.) & 3 on temporalis (ant., middle, post.) | Non-contact | 2mm           | Beam diameter: 6mm              | NI | 3J/cm <sup>2</sup> /point                                                                      | NI | 10 secs/point                                                 | 12 sessions (3 times a week)                 | 4 weeks         |
| De Oliveira et al., 2017, Brazil [82] | GaAlAs diode laser<br>Red-laser: 660nm<br>IR-laser: 790nm | NI | NI                        | Muscle points: 120 mW/point<br>Joints pain: 120mW/point | F: NI<br>PW: NI | NI  | EO: TMJ (post. ligament & lateral pole); EO muscles (Temporalis, masseter, post. mandibular & submand. regions); IO muscle (LPM & temporal tendon) (No. of TP or allocation unspecified)                         | NI          | NI            | Spot size: 0.031cm <sup>2</sup> | NI | Muscle points: 8J/cm <sup>2</sup> /point<br>Joints with sensitivity: 4J/cm <sup>2</sup> /point | NI | Muscle TP: 1.06 sec/point<br>Sensitive joints: 0.33 sec/point | 3 sessions (At an interval of 48 hrs)        | 1 week          |
| Costa et al., 2017, Brazil [83]       | IR-laser (830nm)                                          | NI | 2.8 J/point<br>Total: 14J | 100mW/point                                             | F: NI<br>PW: NI | Yes | EO: 5 TP temporalis (ant., medium, post.) superficial masseter (sup., inf.) [Bilateral applications]                                                                                                             | NI          | NI            | Spot size: 0.028cm <sup>2</sup> | NI | 100J/cm <sup>2</sup> /point                                                                    | NI | 28 secs/point                                                 | 1 session                                    | 1 day           |
| Seifi et al., 2017, Iran [84]         | Diode Laser (810nm)                                       | CW | NI                        | 0.5W                                                    | NA              | NI  | (No. of TP or allocation unspecified)                                                                                                                                                                            | NI          | NI            | Spot size- 5mm                  | NI | NI                                                                                             | NI | 60 sec/point                                                  | 4.5 sessions/week                            | 1 week          |
| Shobha et al., 2017, India [85]       | GaAlAs 810nm diode laser                                  | CW | NI                        | 100mW                                                   | NA              | NI  | EO: at the centre of upper joint space, 1cm in front of tragus & at TP (No. of TP or allocation unspecified)                                                                                                     | Non-contact | NI            | Tip diameter: 300μ              | NI | 6J/cm <sup>2</sup> /point                                                                      | NI | 60 sec/session                                                | 8 sessions (2–3 times a week)                | Approx. 4 weeks |
| Rezazadeh et al., 2017, Iran [86]     | GaAlAs 980nm diode laser                                  | NI | NI                        | 200mW                                                   | F: NI<br>PW: NI | NI  | EO: 3 regions of both sides including post. & ant. aspects of TMJ, as well TP (No. of TP or allocation unspecified)                                                                                              | NI          | NI            | NI                              | NI | 5J/cm <sup>2</sup> /point                                                                      | NI | 2.5 mins                                                      | 8 sessions (Time interval was not mentioned) | 2 weeks         |
| Varma et al., 2018, UAE [87]          | 940nm diode laser                                         | CW | NI                        | 6W                                                      | NA              | NI  | EO: Painful muscular areas over TMJ, masseter, temporalis, trapezius. (No. of TP or allocation unspecified)                                                                                                      | Non-contact | 1cm up to 3cm | NI                              | NI | NI                                                                                             | NI | 300 sec                                                       | 8 sessions (Twice a week)                    | 4 weeks         |

|                                           |                            |    |                                           |                                  |                 |     |                                                                                                                                                                                                                                 |             |     |                                   |    |                                                                                                                                                                                                  |                               |                                                                                                                                                                                             |                              |         |
|-------------------------------------------|----------------------------|----|-------------------------------------------|----------------------------------|-----------------|-----|---------------------------------------------------------------------------------------------------------------------------------------------------------------------------------------------------------------------------------|-------------|-----|-----------------------------------|----|--------------------------------------------------------------------------------------------------------------------------------------------------------------------------------------------------|-------------------------------|---------------------------------------------------------------------------------------------------------------------------------------------------------------------------------------------|------------------------------|---------|
| Borges et al., 2018, Brazil [88]          | AlGaAs diode laser (830nm) | CW | G1: 7.68 J<br>G2:57.6 J<br>G3: 101.12J    | 30mW                             | NA              | Yes | EO: 8 TP (4/side) in TMJ: preauricular region & external acoustic meatus                                                                                                                                                        | Contact     | NA  | Spot size: 0.11600cm <sup>2</sup> | NI | G1: 8 J/cm <sup>2</sup> /point (Total: 64J/cm <sup>2</sup> ),<br>G2: 60J/cm <sup>2</sup> /point (Total: 480J/cm <sup>2</sup> ),<br>G3: 105J/cm <sup>2</sup> /point (Total 840J/cm <sup>2</sup> ) | 2.59 W/cm <sup>2</sup> /point | G1: 32sec/point; 266 sec/session;<br>2586sec/10 sessions<br>G2: 240 sec/point; 1920sec/session;<br>19200 sec/10 sessions<br>G3: 420 sec /point; 3360 sec /session;<br>33600 sec/10 sessions | 10 sessions (3 times a week) | 3 weeks |
| Brochado et al., 2018, Brazil [89]        | GaAlAs 808nm diode laser   | CW | 4 J/ point;<br>48 J/ point or 576 J /side | 100mW/ point                     | NA              | Yes | EO: 12 points/side: 5 in TMJ (sup., ant., lateral, post., postero-inferior to condyle) & 7-temporalis (ant., middle, & post.), masseter (upper, middle, lower), & insertion of MPM                                              | Contact     | NA  | Spot size: 0.03cm <sup>2</sup>    | NI | 13.3J/cm <sup>2</sup> /point<br>Radiant exposure: 133J/cm <sup>2</sup>                                                                                                                           | 3.33 W/cm <sup>2</sup> /point | 40sec/point                                                                                                                                                                                 | 12 sessions (3 times a week) | 4 weeks |
| Rodrigues et al., 2018, Brazil [90]       | GaAlAs 780nm diode laser   | CW | NI                                        | Site 1: (60mW)<br>Site 2: (60mW) | NA              | NI  | EO: Site 1: superficial masseter (upper, middle, lower), Temporalis (ant., middle, post. Site 2: lateral pole of TMJ (5 TP related to lateral pole of mandible head: lateral, sup., ant., post., inf.) [Bilateral application]. | Contact     | NA  | NI                                | NI | Site 1: 30J/cm <sup>2</sup> /point<br>Site 2: 75J/cm <sup>2</sup> /point                                                                                                                         | NI                            | Site 1: 20 sec<br>Site 2: 50 sec                                                                                                                                                            | 8 sessions (Twice a week)    | 4 weeks |
| Peimani et al., 2018, Iran [91]           | 808nm diode laser          | NI | 4J/ point                                 | 50mW                             | F: NI<br>PW: NI | NI  | EO: 3 TP over TMJ/ session (allocation of TP unspecified)                                                                                                                                                                       | Contact     | NA  | Spot size: 0.028cm <sup>2</sup>   | NI | 144J/cm <sup>2</sup> /point                                                                                                                                                                      | 1.78 W/cm <sup>2</sup> /point | 10 sec/point                                                                                                                                                                                | 8 sessions (Twice a week)    | 4 weeks |
| Nadershah et al., 2019, Saudi Arabia [92] | 940nm diode laser          | CW | 300J/ Rx<br>Total dose: 1500J             | 7W                               | NA              | NI  | EO: 5 TP at the temporal (centre of temporalis), zygomatic (origin of masseter), angle of mandible (masseter                                                                                                                    | Non-contact | 2cm | Spot size: 2.8cm <sup>2</sup>     | NI | 300J/cm <sup>2</sup> /point                                                                                                                                                                      | NI                            | 2 min/ application (24 sec/ point)                                                                                                                                                          | 5 sessions (Every 48 h)      | 10 days |

|                                   |                                                                                                                    |                                                       |                                                                                                                             |                                                                                       |                                                                                         |     |                                                                                                               |         |    |                                                                                                                                                                                                          |                                               |                                                                                          |                               |                                                              |                                        |                 |
|-----------------------------------|--------------------------------------------------------------------------------------------------------------------|-------------------------------------------------------|-----------------------------------------------------------------------------------------------------------------------------|---------------------------------------------------------------------------------------|-----------------------------------------------------------------------------------------|-----|---------------------------------------------------------------------------------------------------------------|---------|----|----------------------------------------------------------------------------------------------------------------------------------------------------------------------------------------------------------|-----------------------------------------------|------------------------------------------------------------------------------------------|-------------------------------|--------------------------------------------------------------|----------------------------------------|-----------------|
|                                   |                                                                                                                    |                                                       |                                                                                                                             |                                                                                       |                                                                                         |     | insertion), pre-auricular & mastoid areas<br>[Unilateral application].                                        |         |    |                                                                                                                                                                                                          |                                               |                                                                                          |                               |                                                              |                                        |                 |
| Magri et al., 2019, Brazil [93]   | GaAlAs diode laser 780nm                                                                                           | CW                                                    | NI                                                                                                                          | Masster & ant. temporal (20mW); TMJ (30mW)                                            | NA                                                                                      | NI  | EO: masseter & anterior temporal; TMJ<br>Distance between points: 1 cm (No. of TP or allocation unspecified)  | Contact | NA | NI                                                                                                                                                                                                       | NI                                            | Masseter & ant. temporal: 5J/cm <sup>2</sup> / point<br>TMJ: 7.5J/cm <sup>2</sup> /point | NI                            | 10 sec/ point                                                | 8 sessions (Twice a week)              | 4 weeks         |
| Al-Quisi et al., 2019, Iraq [94]  | Red LED 660nm                                                                                                      | NI                                                    | Total: 1.6J                                                                                                                 | 1.6W                                                                                  | F:NI<br>PW:NI                                                                           | NI  | EO: TMJ, LPM & tender TP on masseter & temporalis (No. of TP or unspecified)                                  | NI      | NI | NI                                                                                                                                                                                                       | NI                                            | NI                                                                                       | NI                            | 3 mins/ point                                                | 4 sessions (Once a week)               | 4 weeks         |
| Herpich et al., 2019, Brazil [95] | Cluster of 9 diodes: one super-pulsed laser diode (905nm), 4 red LED diodes (640nm) & 4 IR-LED diodes (875nm LED). | Laser 905nm: super-pulsed LED (640nm & 875nm): pulsed | Laser total energy 0.27J 640nm LED: 4.5J/ emitter, total: 18 J 875nm LED: 5.25J/ emitter, total: 21 J Total energy: 39.27 J | 905nm diode laser: 0.9 mW [mean output (MOO)] LED: 15mW (MOO) 875nm LED: 17.5mW (MOO) | F: 1000Hz (905nm diode laser)<br>F:2 Hz (640 nm LED)<br>F: 16 Hz (875 nm LED)<br>PW: NI | Yes | IO: Region of pterygoid muscles (No. of TP or allocation unspecified) [Bilateral application].                | Contact | NA | Laser tip size: 0.4cm <sup>2</sup><br>640 nm-LED: 0.9cm <sup>2</sup><br>875 nm-LED: 0.9cm <sup>2</sup><br>Aperture size: 4cm <sup>2</sup> but an adapter with an aperture of 0.394cm <sup>2</sup> for IO | NI                                            | 99.67J/cm <sup>2</sup> / point                                                           | NI                            | Laser: 300 sec<br>640 nm LED: 300 sec<br>875 nm LED: 300 sec | 6 sessions (unspecified time interval) | NI              |
| Khairnar et al., 2019, India [96] | 660nm diode laser                                                                                                  | NI                                                    | 2.2 J/min                                                                                                                   | 60mW                                                                                  | NI                                                                                      | NI  | EO: TMJ region- at centre of upper joint space, 1 cm in front of tragus (No. of TP or allocation unspecified) | Contact | NA | NI                                                                                                                                                                                                       | NI                                            | NI                                                                                       | NI                            | 3 mins                                                       | 15 sessions (an alternate day)         | Approx. 4 weeks |
| Sobral et al., 2020, Brazil [97]  | 808nm±10 nm InGaAlP diode laser                                                                                    | CW                                                    | 6 J/ point                                                                                                                  | 100mW                                                                                 | NA                                                                                      | NI  | EO: Total: 8 TP: 3 on masseter (upper, middle, lower) & 1 point on ant. temporalis [Bilateral application]    | Contact | NA | Beam diameter with spacer: 0.354cm<br>Beam area: 0.0984cm <sup>2</sup>                                                                                                                                   | Irradiated area: 0.7872cm <sup>2</sup> /point | 61J/cm <sup>2</sup> /point                                                               | 1016mW/cm <sup>2</sup> /point | 60 secs/ point                                               | 12 sessions (Twice a week)             | 6 weeks         |
| Maracci et al., 2020, Brazil [98] | GaAlAs 808nm diode laser                                                                                           | CW                                                    | NI                                                                                                                          | 100mW                                                                                 | NA                                                                                      | NI  | EO: 24 TP; 1 cm distance between two sites on TMJ & associated musculature                                    | Contact | NA | NI                                                                                                                                                                                                       | NI                                            | 80J/cm <sup>2</sup> /point                                                               | NI                            | 22 sec/ application                                          | 2 sessions (48 hr interval)            | 3 days          |

|                                     |                      |    |                          |       |    |    |                                                                                                                                                                |         |    |                                             |                                                             |              |                  |                |                           |         |
|-------------------------------------|----------------------|----|--------------------------|-------|----|----|----------------------------------------------------------------------------------------------------------------------------------------------------------------|---------|----|---------------------------------------------|-------------------------------------------------------------|--------------|------------------|----------------|---------------------------|---------|
| Chellappa et al., 2020, India [99]  | 672nm diode laser    | NI | 3J/per site              | 50mW  | NI | NI | EO: 4 sites (masseter, temporalis, condylar regions & intra-auricular portion)                                                                                 | Contact | NA | NI                                          | NI                                                          | NI           | NI               | 120 sec/ point | 6 sessions (Twice a week) | 3 weeks |
| Monteiro et al., 2020, Brazil [100] | 635±10nm diode laser | CW | 16J/ point & Total: 128J | 200mW | NA | NI | EO: depending on painful points (diagnostic questionnaire) at palpation (average of 4 TP/ side) (No. of TP or allocation unspecified) [Bilateral application]. | Contact | NA | Beam diameter: 8mm<br>Beam spot size 0.5cm² | Irradiated area- 0.5cm²/ point (4cm² total irradiated area) | 8J/cm²/point | 400mW/cm²/ point | 20 sec/ point  | 4 sessions (Once a week)  | 4 weeks |
