# Supplementary material for: Role of Photobiomodulation Therapy in Modulating Oxidative Stress in Temporomandibular Disorders. A Systematic Review and Meta-Analysis of Human Randomised Controlled Trials
Source: MDPI journal article supplement (doi:10.3390/antiox10071028), 2021-06-25
Supplement: s1 [file s1]

**Table S1.** Tabular description of all the selected eligible *in vivo* RCTs human studies of TMD, in terms of demography, study design, symptoms, affected areas, functional problems, intervention groups, methods of assessment, evaluation period and outcomes. All the abbreviations in this table are listed in Supplementary File S2.

| Study, year, origin & citation              | Journal name/IF                                                                                                                  | Condition type | Presented symptoms & duration                                                                     | Affected area (s)                                                                                                               | Functional problem                              | Sample size                      | Gender M/F            | Age (yrs) (mean $\pm$ SD)                                  | Skin colour | Intervention groups                                                               | Evaluation period                                                                               | Assessed parameters           | Evaluation methods                      | Conclusion                                                                                                                                                                                                                                                                                                                                   |
|---------------------------------------------|----------------------------------------------------------------------------------------------------------------------------------|----------------|---------------------------------------------------------------------------------------------------|---------------------------------------------------------------------------------------------------------------------------------|-------------------------------------------------|----------------------------------|-----------------------|------------------------------------------------------------|-------------|-----------------------------------------------------------------------------------|-------------------------------------------------------------------------------------------------|-------------------------------|-----------------------------------------|----------------------------------------------------------------------------------------------------------------------------------------------------------------------------------------------------------------------------------------------------------------------------------------------------------------------------------------------|
| Venancio et al., 2005, Brazil [57]          | Journal of Oral Rehabilitation<br>IF 2021: 2.304<br>IF 2005: 0.904                                                               | TMD            | TMJ pain & mandibular dysfunction/ capsulitis/ synovitis & disk displacement + reduction 6 months | TMJ                                                                                                                             | TMJ pain                                        | 30                               | GI: 2/13<br>GII: 3/12 | GI: 34.9 (15–36)<br>GII: 37.6 (13–63)                      | NI          | GI: LILT<br>GII: Sham laser (placebo).                                            | A baseline, 15 <sup>th</sup> , 30 <sup>th</sup> & 60 <sup>th</sup> days                         | Pain assessment, range of MM  | VAS, MM (electronic digital calliper)   | SS in pain reduction on VAS ( $p=0.2060$ ), MVO ( $p=0.3024$ ) & PPT ( $p>0.05$ ) in both GI&II                                                                                                                                                                                                                                              |
| Çetiner et al., 2006, Turkey [58]           | Photomedicine, and Laser Surgery (Now: Photobiomodulation, Photomedicine, and Laser Surgery)<br>IF 2019: 1.918<br>IF 2006: 1.455 | TMD            | Myogenic TMD-associated orofacial pain, limited MM chewing difficulties, and tender points        | Joint capsule (lateral post., sup.), masseter (ant., inf., deep), temporal (ant., deep, middle, origin), MPM, LPM [bilaterally] | Orofacial pain, limited MM chewing difficulties | 39<br>G1: 24<br>G2:15            | G1: 2/22<br>G2: 2/13  | G1: 33.8 $\pm$ 13.9 (16–62)<br>G2: 29.6 $\pm$ 12.5 (17–50) | NI          | G1: LLLT<br>G2: Placebo                                                           | At baseline, immediately & 1 month after therapy                                                | Pain, MMO, chewing difficulty | VAS, MMO (millimetre ruler), Lateral MM | SS reduction in PI & chewing difficulties in G1 were just after & 1- month after treatment, compared to G2 ( $p<0.05$ ). No. of TP decreased significantly in G1 ( $p<0.05$ ). No significant in the mean difference parameters after the therapy and 1 month later in G1&2 ( $p>0.05$ ). SS in MMO between G1& G2 at all follow-up periods. |
| Fikackova et al., 2007, Czech Republic [59] | Photobiomodulation, Photomedicine, and Laser Surgery<br>IF 2019: 1.918<br>IF 2007: 1.207                                         | TMD            | Myofascial pain and TMJ arthralgia                                                                | TMJ                                                                                                                             | Myofascial pain                                 | 80<br>GA: 33<br>GB: 28<br>GC: 19 | 9/71                  | 41 (16–70)                                                 | NI          | GA: 10 J/cm <sup>2</sup><br>GB: 15 J/cm <sup>2</sup><br>GC: 0.1 J/cm <sup>2</sup> | At baseline, 2 <sup>nd</sup> day & last (10 <sup>th</sup> day) LLLT session                     | Pain                          | Pain assessment                         | SS in PI reduction in GA&B than GC ( $p=0.002$ ). No significant intergroup differences & this applied to myofascial pain and/or TMJ arthralgia. SS in TMD duration in GA&GB more than GC ( $p=0.0003$ ), no significant difference between GA &GB.                                                                                          |
| Mazzetto et al., 2007, Brazil [60]          | Cranio: the Journal of Craniomandibular Practice<br>IF 2019: 1.186<br>IF 2007: 0.691                                             | TMD            | Capsulitis, synovitis, retrodiscitis & painful disk displacement with reduction.                  | TMJ                                                                                                                             | Pain                                            | 48                               | NI                    | > 18                                                       | NI          | GI: LLLT<br>GII: Placebo                                                          | Ev1: baseline<br>Ev2: 4 <sup>th</sup> LLLT application<br>Ev3: 8 <sup>th</sup> LLLT application | Pain assessment               | VAS                                     | A decrease in PI at 2 <sup>nd</sup> (mean=2.93), 3 <sup>rd</sup> (mean=2.236) & 4 <sup>th</sup> (mean=2.583) evaluations, independent of probes & palpation, being more evident from 3 <sup>rd</sup>                                                                                                                                         |

|                                    |                                                                                                   |     |                                                                                                           |                                                       |                                                         |                      |                       |                                           |    |                                                                                                                                                     | Ev4: 30 days<br>after last<br>application                                                                                |                                         |                                   | evaluation after 8 <sup>th</sup><br>application.                                                                                                                                                             |
|------------------------------------|---------------------------------------------------------------------------------------------------|-----|-----------------------------------------------------------------------------------------------------------|-------------------------------------------------------|---------------------------------------------------------|----------------------|-----------------------|-------------------------------------------|----|-----------------------------------------------------------------------------------------------------------------------------------------------------|--------------------------------------------------------------------------------------------------------------------------|-----------------------------------------|-----------------------------------|--------------------------------------------------------------------------------------------------------------------------------------------------------------------------------------------------------------|
| Frare et al., 2008, Brazil [61]    | Brazilian Journal of Physical Therapy<br>IF 2019: 2.1<br>IF 2008: 0.154                           | TMD | Pain, joint cracking, temporal, masseter & cervical pain, tooth wear/ fracturing & joint rigidity,        | TMJ, temporal, masseter muscle and neck region        | Pain, joint cracking, muscular tension & joint rigidity | 18<br>G1: 10<br>G2:8 | 0/18                  | 18-45                                     | NI | G1: LLLT<br>G2: Placebo                                                                                                                             | At baseline, immediately after each session for 4 weeks.                                                                 | Pain assessment                         | VAS                               | SS reduction ( $p<0.05$ ) in PI in G1 compared to G2.                                                                                                                                                        |
| Da Cunha et al., 2008, Brazil [62] | International Dental Journal<br>IF 2019: 2.070<br>IF 2008: 0.839                                  | TMD | Pain, muscle disorders 6 months                                                                           | TMJ, EO masticatory muscles & cervical (neck muscles) | Pain                                                    | 40                   | 1/39                  | 20-68<br>GI: 40.15<br>GII: 46.6           | NI | GI: LLLT<br>GII: Placebo                                                                                                                            | At baseline & 4 weeks after treatment                                                                                    | Pain assessment & changes in TMD        | VAS, CMI                          | SS between initial & final values of VAS & CMI ( $p<0.05$ ) at intragroups. SS reduction in pain & TMJ symptoms in GI&II ( $p<0.05$ ). Baseline & post-therapy, no SS in VAS & CM ( $p>0.05$ ) of intergroup |
| Lassemi et al., 2008, Iran [63]    | Journal of Oral Laser Applications<br>IF 2019: (discontinued)                                     | TMD | Pain, clicking                                                                                            | TMJ                                                   | Pain, clicking                                          | 48                   | 24/24                 | >18                                       | NI | GI:<br>Experimental (LLLT)<br>GII: Placebo                                                                                                          | At baseline, immediately 2 <sup>nd</sup> , 4 <sup>th</sup> days, 6 & 12 months after treatment                           | Pain assessment , clicking in TMJ       | VAS, clicking stethoscope         | SS in PI reduction in GI than GII ( $p<0.001$ ). SS in pain & clicking without recurrence up to 2-year, favouring GI ( $p<0.001$ ).                                                                          |
| Carrasco et al., 2008, Brazil [64] | Cranio: the Journal of Craniomandibular Practice<br>IF 2019: 1.186<br>IF 2008: 0.846              | TMD | Capsulitis, synovitis, retrodiscitis, displacement disc + reduction, TMJ pain +/- tender muscles          | TMJ, IO & EO masticatory cervical muscles             | Pain, muscle tenderness                                 | 14                   | NI                    | > 18                                      | NI | GI: LLLT<br>GII: Placebo                                                                                                                            | Baseline, Ev1 (8 <sup>th</sup> session), Ev2: (4 <sup>th</sup> week) , Ev3: 30 days after 1 <sup>st</sup> application    | Pain assessment, masticatory efficiency | VAS, masticatory efficiency (CCM) | SS in TMJ pain reduction ( $p<0.001$ ) in GI. No SS in masticatory behaviour in GI&II. In Ev2: improved symptoms & functionality throughout therapy.                                                         |
| Emshoff et al., 2008, Austria [65] | Oral Surgery, Oral Medicine, Oral Pathology, & Oral Radiology<br>IF 2019: 1.791<br>IF 2008: 1.671 | TMD | Unilateral TMJ pain. Pain onset of 2 years or less                                                        | TMJ                                                   | TMJ pain                                                | 52                   | GI: 4/22<br>GII: 6/20 | 18 -58<br>GI: 44.1±16.6<br>GII: 41.8±11.2 | NI | GI: LLLT<br>GII: sham LLLT                                                                                                                          | At baseline, 2 <sup>nd</sup> , 4 <sup>th</sup> & 8 <sup>th</sup> weeks after treatment.                                  | Pain assessment                         | VAS                               | At 8 <sup>th</sup> week (intragroup): TMJ pain reduction during function, in G I& II ( $p=0.000$ ), but differences were not highly evident ( $p>0.05$ ) in intergroup                                       |
| Carrasco et al., 2009, Brazil [66] | Cranio: the Journal of Craniomandibular Practice<br>IF 2019: 1.186<br>IF 2010: 1.015              | TMD | MPS with combination of regional & referred pain. MM restriction, pain in ant. masseter & ant. temporalis | Ant. of masseter & temporalis muscles                 | Pain & MM restriction                                   | 60                   | NI                    | >18                                       | NI | GI-LLLT (25 J/cm <sup>2</sup> ), GII- LLLT (60 J/cm <sup>2</sup> ), GIII- LLLT (100 J/cm <sup>2</sup> ), GIV- LLLT Placebo (25 J/cm <sup>2</sup> ), | Ev1: Baseline<br>Ev2: immediately after 4 <sup>th</sup> application. Ev3: immediately after 8 <sup>th</sup> application. | Pain assessment                         | VAS                               | A significant decrease in pain levels over time ( $p<0.001$ ), in all groups, starting from Ev3. Placebo was as effective as LLLT in reducing PI ( $p<0.05$ ). No SS between GI & III ( $p>0.05$ ).          |

|                                             |                                                                                                   |                     |                                                                   |                                                                                  |                    |                                     |                        |                                                                            |    |                                                                                                                             |                                                                                                                                                                                                                                                                   |                                                                                       |                                                                                                    |                                                                                                                                                                                                                                                                                                         |
|---------------------------------------------|---------------------------------------------------------------------------------------------------|---------------------|-------------------------------------------------------------------|----------------------------------------------------------------------------------|--------------------|-------------------------------------|------------------------|----------------------------------------------------------------------------|----|-----------------------------------------------------------------------------------------------------------------------------|-------------------------------------------------------------------------------------------------------------------------------------------------------------------------------------------------------------------------------------------------------------------|---------------------------------------------------------------------------------------|----------------------------------------------------------------------------------------------------|---------------------------------------------------------------------------------------------------------------------------------------------------------------------------------------------------------------------------------------------------------------------------------------------------------|
|                                             |                                                                                                   |                     |                                                                   |                                                                                  |                    |                                     |                        |                                                                            |    | GV-LLLT<br>Placebo (60<br>J/cm²), GVI-<br>LLLT Placebo<br>(100 J/cm²)                                                       | Ev4: 15 days &<br>1-month after<br>last session (Ev5)                                                                                                                                                                                                             |                                                                                       |                                                                                                    |                                                                                                                                                                                                                                                                                                         |
| Shirani et<br>al., 2009,<br>Iran [67]       | Lasers in<br>Medical Sciences<br>IF 2019: 2.342<br>IF 2009: 2.598                                 | TMD                 | Myofascial pain<br>1month                                         | Masticatory<br>muscles, lateral &<br>post. of TMJ                                | Myofascial<br>pain | 16                                  | 4/12                   | 16-37<br>(23.8)                                                            | NI | GI: Laser<br>GII: Placebo<br>control                                                                                        | At baseline,<br>immediately, 1<br>week & 3 weeks<br>after 1 <sup>st</sup> therapy                                                                                                                                                                                 | Pain<br>assessment                                                                    | VAS                                                                                                | GI was more effective in<br>PI reduction than GII<br>( <i>p</i> =0.031).                                                                                                                                                                                                                                |
| Venezian<br>et al.,<br>2010,<br>Brazil [68] | Cranio: the<br>Journal of<br>Craniomandibul<br>ar Practice<br>IF 2019: 1.186<br>IF 2010: 1.015    | TMD                 | Myofascial pain                                                   | Bilateral ant.<br>temporalis &<br>masseter muscles<br>(upper, medium &<br>lower) | Myofascial<br>pain | 48                                  | 5/43                   | 18-60<br>(41.58)                                                           | NI | GI-LLLT: 25<br>J/cm², GII-<br>LLLT Placebo:<br>25 J/cm², GIII-<br>LLLT: 60 J/cm²<br>GIV-LLLT<br>placebo: 60<br>J/cm²        | VAS: baseline,<br>immediately<br>after therapy (8 <sup>th</sup><br>laser application<br>& 30 days after<br>treatment. EMG:<br>pre & after 8 <sup>th</sup><br>application (1<br>month).                                                                            | Pain<br>assessment,<br>MVC, MVC<br>with MHI                                           | VAS,<br>Surface<br>EMG [MVC,<br>MVC with<br>MHI]                                                   | SS difference in masseter<br>muscles tenderness in GI<br>than GIV ( <i>p</i> <0.05), but no<br>SS differences in other<br>masticatory muscles<br>(intra & inter groups<br>comparison) ( <i>p</i> >0.05). SS<br>( <i>p</i> <0.05) reduction in PI<br>level in all palpated<br>muscles of all GI,II,III   |
| Oz et al.,<br>2010,<br>Turkey<br>[69]       | The Journal of<br>Craniofacial<br>Surgery<br>IF 2019: 0.938<br>IF 2010: 0.873                     | myofascia<br>l pain | Orofacial pain<br>6 months                                        | TMJ & EO<br>masticatory<br>muscles                                               | Orofacial<br>pain  | 40                                  | SG: 3/17<br>CG: 3/17   | G1: 31.25<br>±8.23<br>CG: 34.52<br>±12.82                                  | NI | G1:: LLLT<br>CG: Occlusal<br>splints                                                                                        | Baseline- 30<br>mins before 1 <sup>st</sup><br>session (week 1)<br>& 30 mins after<br>last session<br>(week 5).                                                                                                                                                   | Mandibular<br>mobility<br>Masticatory<br>muscles<br>tenderness,<br>pain<br>assessment | Functional<br>examination<br>(RDC/TMD)<br>, PPT (dial<br>algometer),<br>VAS                        | SS improvements in<br>vertical movements of the<br>muscles, tenderness on<br>palpation (PPT&VAS)<br>( <i>p</i> <0.01) in intragroup<br>comparison, but not in<br>intergroup comparison<br>( <i>p</i> >0.01). LLLT is as<br>effective as occlusal splint<br>in pain release and MM<br>improvement in MP. |
| Marini et<br>al., 2010,<br>Italy [70]       | Clinical Journal<br>of Pain<br>IF 2019: 3.171<br>IF 2010: 3.900                                   | TMD                 | Disc<br>displacement<br>without<br>reduction or<br>osteoarthritis | TMJ                                                                              | NI                 | 99<br>GI: 39<br>GII: 30<br>GIII: 30 | 25/74                  | 15-55<br>GI:41.93<br>±11.51<br>GII:36.23<br>±11.30<br>GIII: 35.90<br>±6.84 | NI | GI: super-<br>pulsed LLLT<br>(SLLLT)<br>GII: Drug<br>therapy<br>(Ibuprofen 800<br>mg BD, 10<br>days)<br>GIII: sham<br>SLLLT | Pain assessment:<br>baseline, 2 <sup>nd</sup> , 5 <sup>th</sup> ,<br>10 <sup>th</sup> , 15 <sup>th</sup> day & 1<br>month after<br>therapy. MMO:<br>baseline, 15 <sup>th</sup> day<br>& 1 month after<br>therapy.<br>MRI: baseline &<br>1 month after<br>therapy. | Pain<br>assessment,<br>MMO, MM<br>TMJ soft<br>tissue<br>evaluation                    | VAS, MMO<br>& jaw<br>movements<br>(millimetre<br>ruler), MRI<br>(TMJ soft<br>tissue<br>evaluation) | Inter group comparison<br>revealed SS reduction in<br>VAS scores, MMO & TMJ<br>soft tissue evaluation for<br>GI, compared to GII&III<br>( <i>p</i> <0.001) at all<br>corresponding follow-up<br>time-points                                                                                             |
| Rohlig et<br>al., 2011,<br>Turkey<br>[71]   | Turkish Journal<br>Physical<br>Medicine and<br>Rehabilitation<br>IF 2019: 0.190<br>IF 2010: 0.242 | Muscul.ar<br>origin | Orofacial pain<br>lasting for more<br>than 6 months               | TMJ, EO<br>masticatory<br>muscles & cervical<br>(neck muscles)                   | Orofacial<br>pain  | 40                                  | GI: 16/24<br>GII: 8/12 | 43.7±1.8<br>GI: 22-59<br>(42.2±3.4)<br>GII: 28-56<br>(42.8±2.1)            | NI | GI: LLLT<br>GII: Placebo                                                                                                    | Baseline [30mins<br>before 1 <sup>st</sup> session<br>(week 1)] &<br>30mins after last<br>session (week 3).                                                                                                                                                       | MM,<br>masticatory<br>muscles,<br>tenderness,<br>pain<br>assessment                   | Functional<br>(RDC/TMD)<br>, PPT (dial<br>algometer),<br>VAS                                       | SS reduction in PPT,<br>number of muscles with<br>pain on palpation a& MM<br>in GI ( <i>p</i> <0.05) compared<br>to GII.                                                                                                                                                                                |

|                                            |                                                                                      |     |                                  |                                    |                            |    |       |               |    |                                                                                                                            |                                                                                                                                                                        |                                                                                     |                                                                                                             |                                                                                                                                                                                                                                                                                                                |
|--------------------------------------------|--------------------------------------------------------------------------------------|-----|----------------------------------|------------------------------------|----------------------------|----|-------|---------------|----|----------------------------------------------------------------------------------------------------------------------------|------------------------------------------------------------------------------------------------------------------------------------------------------------------------|-------------------------------------------------------------------------------------|-------------------------------------------------------------------------------------------------------------|----------------------------------------------------------------------------------------------------------------------------------------------------------------------------------------------------------------------------------------------------------------------------------------------------------------|
| Sattayut et al., 2012, United Kingdom [72] | Laser Therapy<br>IF 2019: 1.05<br>IF 2012: NI                                        | TMD | Unilateral myofascial pain       | TMJ, EO & IO masticatory muscles   | Myofascial pain            | 30 | 0/30  | 20-50         | NI | G1:low energy LILT (CLILT)<br>G2: modified high energy LILT (MLILT)<br>G3: Placebo laser                                   | Baseline (3 days prior to 1 <sup>st</sup> LLLT session), 1 <sup>st</sup> , 3 <sup>rd</sup> , 5 <sup>th</sup> & 8 <sup>th</sup> day after 1 <sup>st</sup> LLLT session. | PPT of TP in masticatory muscles, unassisted MOSP                                   | PPT (dial algometer), MMO without pain (MOSP) [WBG], Jaw kinesiology, EMG & pain rating index (McGill), SSI | SS improvement in PPT ( $p=0.0001$ ), EMG amplitude ( $p=0.022$ ), myofascial pain ( $p=0.02$ ) & TMJ arthralgia ( $p=0.006$ ) recorded from voluntary clenching (cEMG) in G2 compared to G3. At 2-4 weeks after LILT, 52% reduction in pain (SSI). No SS in any other parameters between G1,2,3 ( $p>0.05$ ). |
| De Carli et al., 2012, Brazil [73]         | Journal of Oral Rehabilitation<br>IF 2021: 2.304<br>IF 2010: 2.761                   | TMD | Pain in TMJ region               | TM J& EO masticatory muscles       | TMJ pain                   | 32 | 3/29  | 18-58 ( 32.4) | NI | GL: active laser & placebo piroxicam (11).<br>GPi: placebo laser & piroxicam (10).<br>G LPi: active laser & piroxicam (11) | At baseline & after 1 <sup>st</sup> , 2 <sup>nd</sup> , 3 <sup>rd</sup> & 4 <sup>th</sup> treatment sessions, 30 days post treatment                                   | Subjective pain, mandibular mobility, joint & muscle related pain on palpation, MMO | VAS, MMO (millimetre ruler), palpation for pain assessment                                                  | SS improvement of VAS scores ( $p<0.05$ ) in intragroup, but no SS intergroup differences. Reduction of pain in joint & muscles on palpation with Piroxicam( $p<0.05$ ) & lowest temporal pain ( $p=0.02$ ) at 30-days follow-up. No difference between G LPi & single therapy (TMJ arthralgia)                |
| da Silva et al., 2012, Brazil [74]         | Cranio: the Journal of Craniomandibular Practice<br>IF 2019: 1.186<br>IF 2012: 1.422 | TMD | TMJ pain 6 months                | TMJ & EO masticatory muscles       | TMJ pain                   | 45 | 15/30 | 25-53 (39.7)  | NI | GI: 52.5 J/cm <sup>2</sup><br>GII: 105 J/cm <sup>2</sup><br>GIII: Placebo                                                  | At baseline, after 1 <sup>st</sup> , 5 <sup>th</sup> & 10 <sup>th</sup> application & 5 weeks post treatment                                                           | Range of MM, MMO, pain assessment                                                   | VAS, MMO digital pachymeter                                                                                 | SS differences between the doses of GI&II at follow-up time points ( $p<0.05$ ), favouring GII. LLLT increased MM & reduced the painful symptoms, compared GIII ( $p<0.05$ ).                                                                                                                                  |
| Panhoca et al., 2013, Brazil [75]          | Lasers in Medical Sciences<br>IF 2019: 2.342<br>IF 2013: 2.735                       | TMD | TMJ Pain during palpation        | TMJ, masseter & temporalis muscles | Limited or painful MM & MO | 30 | 8/22  | 18-40         | NI | GI: red- LED 630±10 nm<br>GII: IR- LED 850± 10 nm<br>GIII: control, IR-red 780 nm                                          | At baseline, 7 <sup>th</sup> & 30 <sup>th</sup> days after treatment.                                                                                                  | Pain, MMO                                                                           | NRS, jaw movement (RDR)                                                                                     | SS reduction in pain & an increase in MMO for all groups ( $p<0.05$ ), but not between groups at baseline or at any period after treatment ( $p\geq 0.05$ ).                                                                                                                                                   |
| Uemoto et al., 2013, Brazil [76]           | Journal of Oral Science<br>IF 2019: 1.2<br>IF 2013: 1.55                             | TMD | Myofascial TP in masseter muscle | Bilateral masseter muscles         | Myofascial pain            | 21 | 0/21  | 20-52 years   | NI | GI: LLLT<br>GII: needle treatment                                                                                          | At baseline, after 4 <sup>th</sup> & 8 <sup>th</sup> day of treatment                                                                                                  | Pain assessment, PPT, MMO, Masseter                                                 | VAS, PPT (DA), MMO (calliper), masseter                                                                     | SS ( $p<0.05$ ) reduction in PI (VAS) only in GI&II. SS increase in PPT in GII ( $p=0.0469$ ) & GI at 4 J/cm <sup>2</sup>                                                                                                                                                                                      |

|                                    |                                                                                      |     |                                                     |                                                                                                                                                |                 |                      |      |             |    |                                                                                              |                                                                                                                                     |                                                                   |                                                                                                  |                                                                                                                                                                                                                                                                                     |
|------------------------------------|--------------------------------------------------------------------------------------|-----|-----------------------------------------------------|------------------------------------------------------------------------------------------------------------------------------------------------|-----------------|----------------------|------|-------------|----|----------------------------------------------------------------------------------------------|-------------------------------------------------------------------------------------------------------------------------------------|-------------------------------------------------------------------|--------------------------------------------------------------------------------------------------|-------------------------------------------------------------------------------------------------------------------------------------------------------------------------------------------------------------------------------------------------------------------------------------|
|                                    |                                                                                      |     |                                                     |                                                                                                                                                |                 |                      |      |             |    | GIII: Placebo-laser (control)                                                                |                                                                                                                                     | muscle function                                                   | function (sEMG)                                                                                  | ( $p=0.0156$ ). No SS in sEMG & MMO in all groups ( $p>0.05$ )                                                                                                                                                                                                                      |
| Ahrari et al., 2014, Iran [77]     | Lasers in Medical Sciences<br>IF 2019: 2.342<br>IF 2014: 2.700                       | TMD | Myogenic TMD, with/without limited MO               | Bilateral TMJ, masseter (origin, body, insertion), temporalis (ant., middle, post.), MPM insertion                                             | Limited MO      | 20                   | 0/20 | 35.5        | NI | GI: LLLT (experimental)<br>GII: placebo (control)                                            | T1: baseline after 6 sessions of laser; T2: end treatment (2 weeks), T3: 4 <sup>th</sup> week, T4: 1-month after last laser session | Level of pain MO                                                  | VAS, MMO (millimetre ruler)                                                                      | SS increase in MO & reduction in pain in GI ( $p<0.05$ ), compared to GII. Intergroup comparison, no SS in PI & MO measurement at any of evaluation time points ( $p>0.05$ ).                                                                                                       |
| Demirkol et al., 2014, Turkey [78] | Lasers in Medical Sciences<br>IF 2019: 2.342<br>IF 2014: 2.700                       | TMD | MPDS (regional pain, reference pain pattern)        | Ant. parts of masseter & temporal muscles                                                                                                      | Myofascial pain | 30                   | NI   | >18         | NI | GA: occlusal splint (n=10)<br>GB: LLLT (n=10)<br>GC: placebo (n=10)                          | At baseline & after treatment (10 <sup>th</sup> day).                                                                               | Pain assessment, Functional examination, pressure pain evaluation | Functional examination (RDC/TMD) VAS                                                             | SS reduction in PI in GA&B, compared to CG ( $p<0.05$ ). No significant difference between GA&B after treatment ( $p>0.05$ ).                                                                                                                                                       |
| Pereira et al., 2014, Brazil [79]  | Cranio: the Journal of Craniomandibular Practice<br>IF 2019: 1.186<br>IF 2014: 1.167 | TMD | TP within pain score >5 on palpation, according NRS | Post. ligament & lateral pole TMJ; EO temporalis, masseter, post. mandibular & submand.; suboccipital, SCM, trapezius IO LPM, temporal tendon, | Pain            | 19                   | 4/15 | 21-55       | NI | G1: red-laser (660 nm)<br>G2: IR-laser (795 nm)                                              | At baseline, 24 hrs & 30 <sup>th</sup> , 90 <sup>th</sup> & 180 <sup>th</sup> days after treatment                                  | Pain assessment, QoL                                              | NRS, QoL (OHIP-14)                                                                               | SS in results of G1&2 ( $p<0.001$ ), improvement in 24 hr-180 <sup>th</sup> days in G1&2. SS difference between them at 180 <sup>th</sup> days, favouring IR-laser ( $p=0.039$ ).                                                                                                   |
| Maia et al., 2014, Brazil [80]     | Lasers in Medical Sciences<br>IF 2019: 2.342<br>IF 2014: 2.700                       | TMD | Myofascial pain                                     | EO masticatory muscles                                                                                                                         | Myofascial pain | 21<br>GI:12<br>GII:9 | 2/19 | 27.76±10.44 | NI | GI: LLLT<br>GII: Placebo                                                                     | MP and PPT: at baseline, after last laser application & after 1 month<br>VAS: at baseline, after each treatment & after 1 month     | Masticatory performance (MP), PPT, pain assessment                | MP [analysis of GMD of chewed particles by OTM], PPT (pressure algometer), pain assessment (VAS) | SS reduction of crushed particles ( $p<0.01$ ) & an increase in PPT ( $p<0.05$ ) in GI compared to baseline & end-treatment values. A decrease in PI at end-treatment in GI: $p<0.001$ ; GII: $p<0.01$ . At 30 days post treatment, a continuous reduction only in GI ( $p<0.001$ ) |
| Sancakli et al 2015, Turkey [81]   | BMC Oral Health<br>IF 2019: 2.292<br>IF 2015: 1.652                                  | TMD | MPDS                                                | EO masticatory muscles                                                                                                                         | Myofascial pain | 30                   | 9/21 | 39.2        | NI | G I: LLLT (greatest TP)<br>GII II: LLLT of at pre-established TP of muscles<br>GIII: Placebo | At baseline (30 min before 1 <sup>st</sup> laser application & 30 min after the last laser application session (after 1 month).     | MM, masticatory muscles tenderness, pain assessment               | Functional examination (RDC/TMD), PPT assessment (Dial algometer), VAS                           | SS in PPT, pain on palpation, MM range in both laser groups ( $p<0.05$ ). SS in all measured values in GI than GII ( $p<0.05$ ). No SS in any measured values in GIII ( $p>0.05$ ).                                                                                                 |

|                                       |                                                                                                |                    |                                                                                                 |                                                                                                                                                              |                                                                                                 |                        |                      |                                                             |    |                                                        |                                                                                                          |                                                                   |                                                                |                                                                                                                                                                                                                                                                                                                         |
|---------------------------------------|------------------------------------------------------------------------------------------------|--------------------|-------------------------------------------------------------------------------------------------|--------------------------------------------------------------------------------------------------------------------------------------------------------------|-------------------------------------------------------------------------------------------------|------------------------|----------------------|-------------------------------------------------------------|----|--------------------------------------------------------|----------------------------------------------------------------------------------------------------------|-------------------------------------------------------------------|----------------------------------------------------------------|-------------------------------------------------------------------------------------------------------------------------------------------------------------------------------------------------------------------------------------------------------------------------------------------------------------------------|
| De Oliveira et al., 2017, Brazil [82] | Cranio: the Journal of Craniomandibular and Sleep Practice<br>IF 2019: 1.186<br>IF 2017: 1.000 | TMD                | Myofascial pain                                                                                 | Post. ligament & lateral pole of TMJ; EO muscles (temporalis, masseter, post. mandibular & submand.); Suboccipital, SCM, trapezius. IO LPM, temporal tendon. | Myofascial pain                                                                                 | 19                     | 4/15                 | 21-55<br>35                                                 | NI | G1: red-laser (660 nm)<br>G2: IR-laser (790 nm)        | At baseline, 24 hrs, 30 <sup>th</sup> , 90 <sup>th</sup> & 180 <sup>th</sup> days after treatment        | Pain assessment, TMJ symptoms in muscles & ligaments              | Pain assessment, pain survival time, recurrence of pain (KMM). | No SS between groups over follow-up ( $p>0.05$ ). Both lasers were effective in reducing TMD symptoms & a low survival rate at 180 <sup>th</sup> days ( $p=0.039$ ). Grinding teeth ( $p<0.001$ ) & headache ( $p=0.001$ ) were associated with recurrent pain.                                                         |
| Costa et al., 2017, Brazil [83]       | Brazilian Oral Research<br>IF 2019: 1.903<br>IF 2017: 1.223                                    | TMD                | Myalgia of temporalis & masseter muscles                                                        | Temporalis & masseter muscles                                                                                                                                | Myalgia                                                                                         | 60                     | 90%<br>Females       | 38.8<br>( $\pm 14.2$ )<br>(18 – 76)<br>M:45.8<br>F: 38.9    | NI | GA: Placebo<br>GB: LLLT                                | Ev1: at baseline<br>Ev2: end-treatment (single session).                                                 | Referred pain elicited by palpation, MMO                          | Muscle palpation (Dial algometer), VAS, MMO (digital calliper) | No SS intergroup differences in range for active or passive MO ( $p\geq 0.05$ ). SS in total pain of right masseter muscle ( $p=0.001$ ) & total PI ( $p=0.005$ ). In EV2, SS differences in PI on palpation between GA&B for all masticatory muscles ( $p<0.05$ ).                                                     |
| Seifi et al., 2017, Iran [84]         | Journal of Lasers in Medical Sciences<br>IF 2019: 0.44<br>IF 2017: NI                          | TMD                | Head & neck pain, tenderness on palpation, especially around ears & during function, limited MO | TMJ & masticatory muscles, including masseter, temporalis, LPM, MPM                                                                                          | Head & neck pain, tenderness on palpation, especially around ears & during function, limited MO | 40                     | NI                   | 18-50                                                       | NI | G1:TENS<br>G2: LLLT<br>G3:sham-TENS,<br>G3: sham-LLLT. | T1: baseline- T2-T5: after each session<br>T6:1-month post treatment                                     | TMJ pain & tenderness, masticatory muscles, mandibular mobility   | VAS, MMO (millimetre ruler)                                    | A decrease in pain ( $p=0.000$ ), tenderness ( $p=0.000$ ) & an increase in MO ( $p=0.002$ ) greater in G1&2 than G3&4. At 1-month follow-up, SS reduction in pain & tenderness in G1&2 ( $p=0.000$ ). No SS between G1&2 & G3&4 in MMO at 1-month ( $p=0.692$ ). Placebo improved symptoms with less important effects |
| Shobha et al., 2017, India [85]       | Indian Journal of Dental Research<br>IF 2019: NI<br>IF 2017: NI                                | TMD                | TMJ pain, joint noises, and muscle pain                                                         | TMJ & EO masticatory muscles                                                                                                                                 | Pain, joint noises                                                                              | 40                     | G1: 3/17<br>G2: 6/14 | 18-40<br>G1: 30.85<br>$\pm 6.31$<br>G2: 27.55<br>$\pm 4.58$ | NI | G1: LLLT<br>G2: Placebo                                | Pain: at baseline , end-treatment (4 weeks) & 30 days after treatment<br>MO: at baseline, end- treatment | Pain during function & at rest, mandibular mobility, TMJ clicking | VAS, MMO (millimetre ruler)                                    | SS increase in MO in G1 ( $p=0.006$ ) & G2 ( $p=0.021$ ), No SS between groups pre- ( $p=0.247$ ) & after therapy ( $p=0.330$ ). SS reduction in clicking in G1 ( $p=0.000$ ) & G2 ( $p=0.001$ ). No SS between groups ( $p=0.752$ ).                                                                                   |
| Rezazadeh et al.,                     | Journal of Dentistry (Shiraz University of                                                     | Drug-resistant TMD | Pain                                                                                            | Deep & superficial masseter, post., ant. & insertion of                                                                                                      | Pain                                                                                            | 45<br>G1: 19<br>G2: 15 | G1: 5/14<br>G2: 4/11 | G1: 31.87<br>G2: 30.79                                      | NI | G1: TENS<br>G2: LLLT                                   | Pain: at baseline & after each session (8), after                                                        | PI, clinical TMD evaluation                                       | VAS, TMD evaluation                                            | SS reduction in Helkimo index in G1&2 pre- & post-treatment ( $p<0.001$ );                                                                                                                                                                                                                                              |

|                                     |                                                                |                          |                                |                                                          |                               |                        |                                                            |                                                                                         |                                                                      |                                                                                                                         |                                                                                                                                  |                                                       |                                                                 |                                                                                                                                                                                                                                                                                                                                                                                                                                                                                                            |
|-------------------------------------|----------------------------------------------------------------|--------------------------|--------------------------------|----------------------------------------------------------|-------------------------------|------------------------|------------------------------------------------------------|-----------------------------------------------------------------------------------------|----------------------------------------------------------------------|-------------------------------------------------------------------------------------------------------------------------|----------------------------------------------------------------------------------------------------------------------------------|-------------------------------------------------------|-----------------------------------------------------------------|------------------------------------------------------------------------------------------------------------------------------------------------------------------------------------------------------------------------------------------------------------------------------------------------------------------------------------------------------------------------------------------------------------------------------------------------------------------------------------------------------------|
| 2017, Iran [86]                     | Medical Sciences)<br>IF 2019: NI<br>IF 2017: NI                |                          |                                | temporal, LPM, MPM ant. digastric, post. digastric & SCM |                               |                        |                                                            |                                                                                         |                                                                      |                                                                                                                         | 4 <sup>th</sup> , 8 <sup>th</sup> & 16 <sup>th</sup> weeks post therapy. Clinical evaluation: at baseline & after treatment      |                                                       | (Helkimo index) (CBP)                                           | but no SS between G1&2 (p=0.17). At 2 <sup>nd</sup> session of treatment, SS reduction in PI ( $p<0.0001$ ) in G1, whereas at 3 <sup>rd</sup> session for G2 ( $P=0.007$ ).                                                                                                                                                                                                                                                                                                                                |
| Varma et al., 2018, UAE [87]        | World Journal of Dentistry<br>IF 2019: 0.123<br>IF 2017: NI    | TMD                      | Pain, clicking, MM limitation  | TMJ, masseter, temporalis, & trapezius muscles           | Pain, clicking, MM limitation | 24<br>GI: 16<br>GII: 8 | 2/22                                                       | 18-50                                                                                   | NI                                                                   | GI: LLLT<br>GII: Placebo laser                                                                                          | At baseline, immediately after each session (8) & 1-month after end-treatment                                                    | PI, clinical TMD evaluation                           | Wong & Baker pain scales                                        | SS reduction in PI ( $p<0.0001$ ) in GI compared to GII ( $p=1.000$ ) pre- & after treatment. At 1-month post-treatment, SS reduction in PI ( $p=0.000$ ) of GI&II.                                                                                                                                                                                                                                                                                                                                        |
| Borges et al., 2018, Brazil [88]    | Lasers in Medical Sciences<br>IF 2019: 2.342<br>IF 2018: 2.263 | TMD                      | Pain                           | Unilateral or bilateral TMJ                              | Pain                          | 44                     | G1: 0/11<br>G2: 1/10<br>G3: 2/9<br>CG: 1/10                | G1: 35.82<br>±13.77<br>G2: 27.73<br>±9.75<br>G3: 34.82<br>±15.28<br>CG: 29.45<br>±12.45 | G1: 10<br>W/1B<br>G2: 11<br>W/0B<br>G3: 11<br>W/0B<br>CG: 10<br>W/1B | G1: LLLT-8<br>J/cm <sup>2</sup><br>G2: LLLT-60<br>J/cm <sup>2</sup><br>G3: LLLT-105<br>J/cm <sup>2</sup><br>CG- placebo | At baseline & after 10 <sup>th</sup> session (Approx. 3 weeks)                                                                   | Pain assessment, symptom severity, joint mobility, MO | VAS, TMD evaluation<br>Anamnestic TMJ mobility                  | SS increase in MO in G1 ( $p<0.05$ ). SS decrease in PI in all groups ( $p<0.05$ ). An effective reduction in TMJ pain & other symptoms at all tested doses of 830nm laser-PBM, but 8 J/cm <sup>2</sup> most effective in MMO & MP ( $p<0.05$ ).                                                                                                                                                                                                                                                           |
| Brochado et al., 2018, Brazil [89]  | Brazilian Oral Research<br>IF 2019: 1.903<br>IF 2018:1.544     | Myogenic & atherogen -ic | Pain in TMJ & limited MO       | TMJ, IO & EO masticatory muscles                         | Pain in TMJ & limited MO      | 41                     | G1:LLL (0/14)<br>G2: MT (2/12)<br>G3: combined (CT) (1/13) | G 1: LLLT (45.7 ± 15.7)<br>G2 :MT (41.2 ± 20.3)<br>G3: CT (46.5 ± 14.4)                 | NI                                                                   | G1: LLLT<br>G2: MT<br>G3: combined (CT)                                                                                 | At baseline, 7 <sup>th</sup> , 14 <sup>th</sup> , 21 <sup>st</sup> , 28 <sup>th</sup> , 60 <sup>th</sup> , 90 <sup>th</sup> days | PI, MM, psychosocial aspects & anxiety                | VAS, functional examination (RDC/TMD), anxiety assessment (BAI) | SS reduction in PI & improvement in MM during treatment & at follow-up ( $p<0.001$ ) in G1,2,3, but from psychosocial aspects, no effect in PI modification ( $p>0.05$ ). SS reduction in depression in G1&3 ( $p\leq0.05$ ). SS reduction in physical symptoms +/- pain & improvement in jaw disabilities ( $p\leq0.05$ ) in G1,2&3. MT: improvement in 5 functions, 2 in G1 & 1 in G2 ( $p<0.001$ ). SS reduction in anxiety in G1,2,3 ( $p\leq0.05$ ). No more benefits from G3 compared to G1&2 alone. |
| Rodrigues et al., 2018, Brazil [90] | Cranio: the Journal of Craniomandibul                          | TMD                      | Muscle pain in the face, joint | TMJ, IO & EO masticatory muscles                         | Muscle pain                   | 78                     | 0/78                                                       | 18–60<br>(31.94 ± 9.57)                                                                 | NI                                                                   | G1: Active laser (30)<br>G2: Placebo laser (29)                                                                         | At baseline, end-treatment (4 <sup>th</sup> week) & 30 days post treatment                                                       | OMC, TMD severity, PI, PPT                            | Masticatory test, OMES, VAS, PPT                                | Reduction of PI during chewing & better recovery levels during rest period ( $p>0.05$ ) in                                                                                                                                                                                                                                                                                                                                                                                                                 |

|                                            |                                                                               |                  |                                                                                                                                       |                                  |                                                                                                                    |                          |                               |                                                       |    |                                                                      |                                                                                                                                              |                                               |                                                                                                       |                                                                                                                                                                                                                                                                       |
|--------------------------------------------|-------------------------------------------------------------------------------|------------------|---------------------------------------------------------------------------------------------------------------------------------------|----------------------------------|--------------------------------------------------------------------------------------------------------------------|--------------------------|-------------------------------|-------------------------------------------------------|----|----------------------------------------------------------------------|----------------------------------------------------------------------------------------------------------------------------------------------|-----------------------------------------------|-------------------------------------------------------------------------------------------------------|-----------------------------------------------------------------------------------------------------------------------------------------------------------------------------------------------------------------------------------------------------------------------|
|                                            | ar and Sleep Practice<br>IF 2019: 1.186<br>IF 2017: 1.047                     |                  | dysfunction 6 months                                                                                                                  |                                  |                                                                                                                    |                          |                               |                                                       |    | G3: Control (19)                                                     |                                                                                                                                              | (dial algometer)                              | G1&2, without differences in OMC between groups. Means for OMES were similar between G1,2&3 (p<0.05). |                                                                                                                                                                                                                                                                       |
| Peimani et al., 2018, Iran [91]            | Journal of Oral Health and Dental Sciences<br>IF 2019: NI<br>IF 2018: NI      | TMD              | Dysfunction of masticatory muscles, restrictive jaw movements, bruxism or clenching, clicking sound & sensitivity to palpation at TMJ | TMJ, masticatory muscles (EO)    | Masticatory muscles dysfunction, restrictive jaw movements, bruxism or clenching, clicking sound & TMJ sensitivity | 72                       | G1: 12/24<br>G2:14/22         | 20-45<br>G1:29.06±6.85<br>G2:28.72±9.47               | NI | G1: Drug therapy (Naproxen 500mg & diazepam, BD,10 days)<br>G2: LLLT | At baseline, immediately, 1 <sup>st</sup> , 2 <sup>nd</sup> & 4 <sup>th</sup> weeks after the treatment.                                     | Pain assessment, clicking & TP tenderness     | VAS, AROM                                                                                             | A reduction in pain, clicking& tenderness in G1&2. SS reduction in PI values on VAS in G1 immediately after treatment (p<0.01). SS increase in AROM index, in G2 (p<0.01). laser & drug therapies were effective, but significant decrease in recovery process in G2. |
| Nadersha h et al., 2019, Saudi Arabia [92] | Journal of Maxillofacial and Oral Surgery<br>IF 2019: NI                      | Myofasci al pain | Unilateral TMJ & masticatory muscles pain during function                                                                             | TMJ, masticatory muscles (EO)    | TMJ & muscle pain during function                                                                                  | 212<br>GI: 108<br>CG: 94 | PBMT: 49/59<br>Control: 43/51 | GI: LLLT 19-58 (34.3 ±10.5)<br>CG: 18-58 (33.3 ±10.7) | NI | GI: LLLT<br>CG: Sham laser                                           | At baseline & up to 10 days, every 48hr                                                                                                      | Pain assessment                               | VAS                                                                                                   | Statistically significant reduction in PI in GI compared to CG (p=0.01).                                                                                                                                                                                              |
| Magri et al., 2019, Brazil [93]            | Cranio: the Journal of Craniomandibul ar and Sleep Practice<br>IF 2019: 1.186 | Myofasci al pain | Pain in facial region<br>At least 3 months                                                                                            | TMJ, EO masticatory muscles      | Facial pain during function                                                                                        | 41                       | 0/41                          | 31.7±5.2                                              | NI | GI: Laser: 20<br>GII: Placebo: 21                                    | At baseline, immediately after the last laser session (T8), 4 <sup>th</sup> weeks & 6 <sup>th</sup> ,12 <sup>th</sup> months after treatment | Pain on palpation, referred pain MM           | VAS, functional examination (RDC/TMD)                                                                 | At T8 & 6 months, reduction in PI (p<0.05) in GI& II.<br>At 1-year, GI&II showed no difference in PI (p>0.05). Active LLLT was more effective in reducing pain on palpation (p=0.001) & referred pain (p=0.04) in TMJs regions                                        |
| Al-Quisi et al., 2019, Iraq [94]           | Pain Research and Treatment<br>IF 2019: 2.153                                 | TMD              | Myofascial pain                                                                                                                       | TMJ, IO & EO masticatory muscles | Myofascial pain                                                                                                    | 50                       | 10/40<br>GA: 7/18<br>GB: 3/22 | 19-24<br>GA: 21.8<br>GB: 19.5                         | NI | GA: LED-LLLT<br>GB: Placebo                                          | At baseline & each visit (once a week for 4 weeks)                                                                                           | Pain assessment                               | VAS                                                                                                   | The changes in PI values & no. of tender muscles in both groups were highly significant, only GB less but with no significant differences (p>0.05).                                                                                                                   |
| Herpich et al., 2019, Brazil [95]          | Lasers in Medical Sciences<br>IF 2019: 2.342                                  | TMD              | Myogenous TMD                                                                                                                         | LPM                              | Moderate to severe pain on palpation                                                                               | 30                       | 0/30                          | GA: 25.44 ±5.76<br>GB: 26.55 ±4.6                     | NI | GA: LLLT<br>GA: Sham LLLT (CG)                                       | At baseline, end 1 <sup>st</sup> session, then 24 hr & 48 hr after that & after 6 sessions.                                                  | Pain assessment, Range of MM, TMJ functioning | VAS, MMO (digital calliper), TMJ functioning (functional scale)                                       | SS improvement in PI (p≤0.01) & functioning (p≤0.04) in GA than GB, but no SS difference in range of MM (p>0.05)                                                                                                                                                      |



|                                     |                                                                           |                            |                                                   |                                   |                                   |                   |                               |                                      |    |                                                    |                                                    |                                                                                 |                                                   |                                                                                                                                                                                 |
|-------------------------------------|---------------------------------------------------------------------------|----------------------------|---------------------------------------------------|-----------------------------------|-----------------------------------|-------------------|-------------------------------|--------------------------------------|----|----------------------------------------------------|----------------------------------------------------|---------------------------------------------------------------------------------|---------------------------------------------------|---------------------------------------------------------------------------------------------------------------------------------------------------------------------------------|
| Khairmar et al., 2019, India [96]   | Journal of Dental Anesthesia and Pain Medicine IF 2019: NI                | TMD                        | TMD-related pain > 3 months                       | TMJ                               | TMD-related pain                  | 42                | 20/22                         | 25-45 (37±2.13)                      | NI | GA: LLLT<br>GB: Ultrasound therapy                 | At baseline & 30 days after treatment              | Pain assessment, MM                                                             | VAS, MMO (Flexible millimetre ruler)              | SS in the mean VAS & mean MO values, favouring GA (p<0.05).                                                                                                                     |
| Sobral et al., 2020, Brazil [97]    | Research Society and Development IF 2019: NI                              | TMD                        | Myofascial pain, disc displacement with reduction | EO masticatory muscles            | Myofascial pain                   | 23 (GA:12, GB:11) | 2/21                          | 22.91                                | NI | GA: LLLT<br>GB: Occlusal splints                   | At baseline & 30 days after treatment              | Pain assessment, QoL, cost-effectiveness                                        | VAS, functional examination (RDC/TMD), EuroQol-5D | A decrease in PI on VAS, in GA&B, before & after 1 month of therapy (p<0.05) with no difference between groups. Positive impact on QoL in GA&B with higher value in GA (p<0.05) |
| Maracci et al., 2020, Brazil [98]   | Cranio: the Journal of Craniomandibular and Sleep Practice IF 2019: 1.186 | TMD                        | Myofascial pain (with or without MM limitation)   | TMJ, EO masticatory muscles       | Myofascial pain +/- MM limitation | 31                | 73.3% female                  | 18-60 (mean-33.27)                   | NI | G1: occlusal splint<br>G2: LLLT<br>G3: LLLT (sham) | At baseline & 1 month after treatment.             | Pain on palpation, Oral Health related QoL                                      | Functional examination (RDC/TMD), QoL (OHIP)      | An improvement in PI (p=0.014) & myofascial pain diagnosis in G1 (p=0.008) compared to G2&3. SS improvement in OHR-QoL in G1&2 (p=0.005) than G3.                               |
| Chellappa et al., 2020, India [99]  | Indian Journal of Dental Research IF 2019: NI                             | TMD                        | Persistent, recurrent, or chronic TMJ pain        | TMJ                               | TMJ pain                          | 60                | NI                            | Above 18                             | NI | GA: LLLT<br>GB: TENS                               | At baseline, after each laser session (6 sessions) | Pain assessment, MM                                                             | VAS, NRS Distress scale                           | Significantly higher reduction in PI & increase in MM in GA more than GB (p<0.01).                                                                                              |
| Monteiro et al., 2020, Brazil [100] | Photobiomodulation, Photomedicine, and Laser Surgery IF 2019: 1.918       | Unilateral / bilateral TMD | Painful myofascial TMD                            | TMJ & EO & IO muscles mastication | Myofascial pain                   | 42                | 10/32<br>GA: 5/15<br>GB: 5/17 | 27.4±9.71<br>GA:29.1±11<br>GB:25.6±8 | NI | GA: LLLT<br>GB: Placebo                            | At baseline & 1 month after treatment.             | Non-assisted & perception pain MM, tenderness elicited by palpating the muscles | VAS, MMO (pachymeter)                             | SS reduction in PI in GA compared to GB after treatment (p<0.001). SS increase in non-assisted painless MM in GA compared to GB (p=0.007).                                      |
