# Supplementary material for: Role of Photobiomodulation Therapy in Modulating Oxidative Stress in Temporomandibular Disorders. A Systematic Review and Meta-Analysis of Human Randomised Controlled Trials
Source: MDPI journal article supplement (doi:10.3390/antiox10071028), 2021-06-25
Supplement: s1 [file s1]

**Supplementary File S2: List of abbreviations (In alphabetical order)**

| <b>Sr. no.</b> | <b>Abbreviation</b> | <b>Full form</b>                               |
|----------------|---------------------|------------------------------------------------|
| 1.             | AROM                | Active range of motion reference               |
| 2.             | ATP                 | Adenosine triphosphate                         |
| 3.             | BD                  | Twice a day                                    |
| 4.             | CCO                 | Cytochrome c oxidase                           |
| 5.             | CG                  | Control group                                  |
| 6.             | COX-2               | Cyclooxygenase- 2                              |
| 7.             | CCRCT               | Cochrane Central Register of Controlled Trials |
| 8.             | CCM                 | colorimetric capsule method                    |
| 9.             | CBP                 | computerised biophotogrammetry                 |
| 10.            | CI                  | Confidence interval                            |
| 11.            | cm                  | Centimetre                                     |
| 12.            | cm <sup>2</sup>     | Square centimetre                              |
| 13.            | CW                  | Continuous emission mode                       |
| 14.            | DA                  | Digital algometer                              |
| 15.            | DF                  | Degrees of freedom                             |
| 16.            | ↓                   | Decrease                                       |
| 17.            | et al               | And others                                     |
| 18.            | EO                  | Extraoral                                      |
| 19.            | EMG                 | Electromyography                               |
| 20.            | EuroQol-5D          | European Quality of life-5 dimensions          |
| 21.            | F.n.                | Fusobacterium nucleatum                        |
| 22.            | GaAlAs              | Gallium-aluminium-arsenide laser               |
| 23.            | GaAs                | Gallium-arsenide laser                         |
| 24.            | Ga-Ar               | Gallium argo                                   |
| 25.            | GMD                 | Geometric mean diameter                        |
| 26.            | GI                  | Group I                                        |
| 27.            | GII                 | Group II                                       |
| 28.            | GIII                | Group III                                      |
| 29.            | GIV                 | Group IV                                       |
| 30.            | GV                  | Group V                                        |
| 31.            | G1                  | Group 1                                        |
| 32.            | G2                  | Group 2                                        |
| 33.            | G A                 | Group A                                        |
| 34.            | G B                 | Group B                                        |
| 35.            | G 1                 | Group 1                                        |
| 36.            | G 2                 | Group 2                                        |
| 37.            | HeNe                | Helium-neon laser                              |
| 38.            | HA                  | Hyaluronic acid                                |
| 39.            | hr                  | Hour                                           |
| 40.            | ↑                   | Increase                                       |
| 41.            | IL                  | Interleukin                                    |
| 42.            | IL-1β               | Interleukin-1 beta                             |
| 43.            | IL-1,6,8            | Interleukin-1,6,8                              |
| 44.            | IF-γ                | Interferon- gamma                              |

|     |                   |                                                                               |
|-----|-------------------|-------------------------------------------------------------------------------|
| 45. | IF                | Impact Factor                                                                 |
| 46. | IgA               | Immunoglobulin A                                                              |
| 47. | IGF-I             | Insulin-like growth factor-I                                                  |
| 48. | IgG               | Immunoglobulin G                                                              |
| 49. | IO                | Intraoral                                                                     |
| 50. | IR                | Infrared                                                                      |
| 51. | Inf.              | Inferior                                                                      |
| 52. | InGaAlP           | Indium-gallium- aluminum-phosphide laser                                      |
| 53. | IMMPACT II        | Initiative on Methods, Measurement, and Pain Assessment in Clinical Trials II |
| 54. | I <sup>2</sup>    | Statistical test for percentage variation due to heterogeneity                |
| 55. | J                 | Joule                                                                         |
| 56. | J/cm <sup>2</sup> | Joules per square centimeter                                                  |
| 57. | KMM               | Kaplan-Meier method                                                           |
| 58. | LPM               | Lateral pterygoid muscle                                                      |
| 59. | LG                | Laser group                                                                   |
| 60. | LEDs              | Light emitted diodes                                                          |
| 61. | LLLT              | Low level laser therapy                                                       |
| 62. | MHI               | Maximum habitual intercuspatation                                             |
| 63. | NRS               | Numeric Rating Scale                                                          |
| 64. | MP                | Mandibular protrusion                                                         |
| 65. | MT                | Manual therapy                                                                |
| 66. | MPM               | Medial pterygoid muscle                                                       |
| 67. | MeSH              | Medical Subject Headings                                                      |
| 68. | MVC               | Maximal volunteer clenching                                                   |
| 69. | min               | Minute                                                                        |
| 70. | μm                | Micrometer                                                                    |
| 71. | μsec              | Microsecond                                                                   |
| 72. | Msec              | Millisecond                                                                   |
| 73. | mm                | Millimeter                                                                    |
| 74. | MM                | Mandibular movement                                                           |
| 75. | MOPO              | Mean optic power output                                                       |
| 76. | MO                | Mouth opening                                                                 |
| 77. | MMO               | Maximum mouth opening                                                         |
| 78. | MMP-1             | Matrix metalloproteinase-1                                                    |
| 79. | MMP-2             | Matrix metalloproteinase-2                                                    |
| 80. | MMP-7             | Matrix metalloproteinase-7                                                    |
| 81. | MMP-9             | Matrix metalloproteinase-9                                                    |
| 82. | MP                | Masticatory performance                                                       |
| 83. | MRI               | Magnetic resonance imaging                                                    |
| 84. | MTP               | Myofascial trigger point                                                      |
| 85. | mW                | Milliwatt                                                                     |
| 86. | M/F               | Male/ Female                                                                  |
| 87. | n                 | Sample size                                                                   |
| 88. | N                 | No                                                                            |
| 89. | No.               | Number                                                                        |
| 90. | nsec              | Nanosecond                                                                    |
| 91. | nm                | Nanometer                                                                     |
| 92. | NI                | No information                                                                |
| 93. | NA                | Not applicable                                                                |

|      |                           |                                                                       |
|------|---------------------------|-----------------------------------------------------------------------|
| 94.  | Nd:YAG                    | Neodymium-doped yttrium aluminum garnet                               |
| 95.  | NS                        | Not specified                                                         |
| 96.  | OTM                       | Optical test material                                                 |
| 97.  | OS                        | Oxidative stress                                                      |
| 98.  | OSG                       | Occlusal splint group                                                 |
| 99.  | PBM                       | Photobiomodulation                                                    |
| 100. | PBMT                      | Photobiomodulation therapy                                            |
| 101. | PGE 2                     | Prostaglandin E2                                                      |
| 102. | PG                        | Parallel group                                                        |
| 103. | PI                        | Pain intensity                                                        |
| 104. | Post.                     | Posterior                                                             |
| 105. | PPT                       | Pessure pain threshold                                                |
| 106. | PRISMA                    | Preferred Reporting Items for Systematic Reviews and Meta-Analyses    |
| 107. | PROSPERO                  | Prospective Register Of Systematic Reviews                            |
| 108. | Q                         | Cochran's heterogeneity statistic                                     |
| 109. | QoL                       | Quality of life                                                       |
| 110. | ROS                       | Reactive oxygen species                                               |
| 111. | RoB 2                     | Revised Cochrane Risk-of-Bias tool for Randomized trials, Version 2.0 |
| 112. | RCT                       | Randomised clinical trial                                             |
| 113. | RDR                       | Researcher-developed rule                                             |
| 114. | RDC/TMD                   | Research Diagnostic Criteria for Temporomandibular Disorders          |
| 115. | SCM                       | Sternocleidomastoid muscle                                            |
| 116. | SD                        | Standard deviation                                                    |
| 117. | SE                        | Standard error                                                        |
| 118. | SMD                       | Standardised mean difference                                          |
| 119. | sec/ s                    | Second                                                                |
| 120. | SS                        | Statistical significant                                               |
| 121. | Submand.                  | Submandibular                                                         |
| 122. | Sup.                      | Superior                                                              |
| 123. | TENS                      | Transcutaneous electrical nerve stimulation                           |
| 124. | TGF- $\beta$ 1            | Transforming growth factor- $\beta$ 1                                 |
| 125. | TMJ                       | Temporo-mandibular joint                                              |
| 126. | TMD                       | temporomandibular disorder                                            |
| 127. | TNF- $\alpha$             | Tumor necrosis factor- alpha                                          |
| 128. | TNF- $\beta$ and $\alpha$ | Tumour necrotic factor beta and alpha                                 |
| 129. | TP                        | Trigger points                                                        |
| 130. | VAS                       | Visual analogue scale                                                 |
| 131. | VEGF                      | Vascular endothelial growth factor                                    |
| 132. | W                         | Watt                                                                  |
| 133. | W/cm <sup>2</sup>         | Watts per square centimetre                                           |
| 134. | WBG                       | Willis Bite Gauge                                                     |
| 135. | Y                         | Yes                                                                   |
| 136. | %                         | Percentage                                                            |
