# Supplementary material for: Role of Photobiomodulation Therapy in Modulating Oxidative Stress in Temporomandibular Disorders. A Systematic Review and Meta-Analysis of Human Randomised Controlled Trials
Source: MDPI journal article supplement (doi:10.3390/antiox10071028), 2021-06-25
Supplement: s1 [file s1]

**Table S3.** Tabular description of all the selected eligible *in vivo* RCTs human studies of TMD, in terms of level of significance in subjective and objective assessments of pain, functionality improvement and anxiety reduction/QoL improvement. The abbreviations are listed in Supplementary File S2.

[illegible]

|                                           |    |    |    |    |    |    |    |    |    |    |    |    |
|-------------------------------------------|----|----|----|----|----|----|----|----|----|----|----|----|
| Borges et al., 2018, Brazil [88]          | Y  | N  | NS | NS | NS | NS | Y  | N  | NS | NS | NS | NS |
| Brochado et al., 2018, Brazil [89]        | Y  | N  | NS | NS | NS | NS | Y  | N  | Y  | N  | NS | NS |
| Rodrigues et al., 2018, Brazil [90]       | Y  | N  | NS |
| Peimani et al., 2018, Iran [91]           | Y  | N  | NS | NS | NS | NS | Y  | N  | NS | NS | NS | NS |
| Nadershah et al., 2019, Saudi Arabia [92] | Y  | N  | NS |
| Magri et al., 2019, Brazil [93]           | Y  | N  | NS | NS | NS | NS | Y  | N  | NS | NS | NS | NS |
| Al-Quisi et al., 2019, Iraq [94]          | Y  | N  | NS |
| Herpich et al., 2019, Brazil [95]         | Y  | N  | NS | NS | Y  | N  | N  | Y  | NS | NS | NS | NS |
| Khairnar et al., 2019, India [96]         | Y  | N  | NS | NS | NS | NS | Y  | N  | NS | NS | NS | NS |
| Sobral et al., 2020, Brazil [97]          | Y  | N  | NS | NS | NS | NS | Y  | N  | Y  | N  | NS | NS |
| Maracci et al., 2020, Brazil [98]         | NS | NS | NS | NS | NS | NS | N  | Y  | N  | Y  | NS | NS |
| Chellappa et al., 2020, India [99]        | Y  | N  | NS |
| Monteiro et al., 2020, Brazil [100]       | Y  | N  | NS | NS | NS | NS | Y  | N  | NS | NS | NS | NS |
